# Supplementary material for: Integrated network findings reveal ubiquitin-specific protease 44 overexpression suppresses tumorigenicity of liver cancer
Source: Aging (Albany NY). 2023 May 18;15(10):4304–18. doi: 10.18632/aging.204733 (PMC10258026; doi:10.18632/aging.204733)
Supplement: Supplementary Table 1 [file aging-15-204733-s001.xlsx]

## Sheet: Sheet1
Supplementary Table 1. List of differentially expressed genes in USP44-overexpressing HepG2 cells.
gene symbol	gene name	log2 fold change (USP44/vector)	q-value
BLOC1S5-TXNDC5	BLOC1S5-TXNDC5 readthrough (NMD candidate)	-18.3603	5.31717e-14
RPL17-C18orf32	RPL17-C18orf32 readthrough	-15.6583	0.0163891
TMEM189-UBE2V1	TMEM189-UBE2V1 readthrough	-15.3151	4.70923e-11
AC126283	novel protein	-12.8737	2.97696e-08
AC099518	novel transcript	-11.6691	4.58074e-07
AC017116	novel transcript, sense overlapping DBNL	-11.6642	0.00393014
AL157871	novel transcript, antisense to WARS	-11.5392	0.0117288
AL109827	novel protein	-11.2589	7.29555e-07
CHURC1-FNTB	CHURC1-FNTB readthrough	-10.9395	3.54658e-07
LINC01943	long intergenic non-protein coding RNA 1943	-10.2826	0.00227349
AL354740	novel transcript, antisense to C6orf1	-9.71822	0.039487
H2BC6	H2B clustered histone 6	-9.61785	0.00618108
C19orf38	chromosome 19 open reading frame 38	-9.58662	0.0287062
GEM	GTP binding protein overexpressed in skeletal muscle	-8.94713	0.023354
AP003071	novel protein, TPCN2 - SMIM38 readthrough	-8.92428	5.86889e-07
PTPRC	protein tyrosine phosphatase receptor type C	-7.38868	0.0109936
HSPA6	heat shock protein family A (Hsp70) member 6	-7.14872	0.0358358
AC116366	novel protein	-6.79624	0.0436801
HSPA7	heat shock protein family A (Hsp70) member 7 (pseudogene)	-6.62193	0.0199378
SNORD26	small nucleolar RNA, C/D box 26	-5.9854	0.000818065
AC003002	novel protein	-5.93908	0.0348622
GPR22	G protein-coupled receptor 22	-5.06056	0.0419173
KRTAP2-4	keratin associated protein 2-4	-4.59702	0.0267636
HBB	hemoglobin subunit beta	-4.50328	0.00527171
AC021086	novel transcript	-4.32742	0.013056
AC091167	novel protein	-4.1381	0.0282045
AC092143	novel transcript (MC1R-TUBB3 readthrough)	-4.08735	0.000559614
TPM1-AS	TPM1 antisense RNA	-3.76714	4.65202e-07
AC073349	novel transcript, antisense to ZNF138	-3.64863	0.0308454
EGR4	early growth response 4	-3.55799	3.26892e-05
EDN1	endothelin 1	-3.23129	6.64588e-08
CCN1	cellular communication network factor 1	-3.19907	1.06415e-08
SLC7A11	solute carrier family 7 member 11	-3.08803	0.0118868
FOSB	FosB proto-oncogene, AP-1 transcription factor subunit	-2.89134	0.000562903
SCN1A-AS1	SCN1A and SCN9A antisense RNA 1	-2.76162	7.38456e-05
ANKRD1	ankyrin repeat domain 1	-2.76046	0.00940181
ZNF791	zinc finger protein 791	-2.70049	5.8853e-15
SLC4A1APP1	solute carrier family 4 member 1 adaptor protein pseudogene 1	-2.67665	0.00679818
NR4A3	nuclear receptor subfamily 4 group A member 3	-2.61424	0.00267281
ARC	activity regulated cytoskeleton associated protein	-2.59624	0.000732901
FSIP2	fibrous sheath interacting protein 2	-2.52562	0.000284493
AL033397	novel transcript	-2.46595	4.28172e-07
CYP1A1	cytochrome P450 family 1 subfamily A member 1	-2.40891	4.87597e-05
EGR3	early growth response 3	-2.38354	9.5856e-06
CCN2	cellular communication network factor 2	-2.38124	0.000173721
AL133346	novel transcript	-2.35461	8.2925e-05
KBTBD8	kelch repeat and BTB domain containing 8	-2.3007	0.000795834
GBP1	guanylate binding protein 1	-2.22844	0.000595485
NEXN	nexilin F-actin binding protein	-2.17683	0.0147961
AL358852	novel transcript, antisense to LATS1	-2.17624	0.0227701
ZNF551	zinc finger protein 551	-2.08844	0.0134786
THAP9	THAP domain containing 9	-2.08241	0.00378562
THBS1	thrombospondin 1	-2.05652	0.000125886
GPRASP1	G protein-coupled receptor associated sorting protein 1	-2.0096	0.000271561
LCA5	lebercilin LCA5	-1.9773	0.0190879
AC114401	novel transcript	-1.96069	0.00479896
GLIPR1	GLI pathogenesis related 1	-1.93963	0.000417965
FAM217B	family with sequence similarity 217 member B	-1.91827	0.0169395
AC105105	novel transcript, antisense to ALPK2	-1.89531	0.017771
SLC16A6	solute carrier family 16 member 6	-1.89139	0.000732901
CTRL	chymotrypsin like	-1.87712	0.0379087
AL139241	novel transcript	-1.8513	0.00761083
AC064801	novel transcript, antisense to ZCCHC2	-1.84206	0.0156889
ZKSCAN8	zinc finger with KRAB and SCAN domains 8	-1.83804	0.00961001
APOB	apolipoprotein B	-1.83243	0.0234826
BAZ2B	bromodomain adjacent to zinc finger domain 2B	-1.80601	0.0147961
ACTA1	actin alpha 1, skeletal muscle	-1.80387	0.000501588
HIVEP1	HIVEP zinc finger 1	-1.75412	0.0125209
CHML	CHM like Rab escort protein	-1.74658	0.0134034
PYROXD1	pyridine nucleotide-disulphide oxidoreductase domain 1	-1.74598	0.0461694
CLGN	calmegin	-1.73691	0.00413303
RANBP2	RAN binding protein 2	-1.72795	0.0201256
BRCA2	BRCA2 DNA repair associated	-1.69399	0.00704444
CCPG1	cell cycle progression 1	-1.65035	0.0239856
TUFT1	tuftelin 1	-1.63712	0.000818065
DLX2	distal-less homeobox 2	-1.63035	0.000266421
RIF1	replication timing regulatory factor 1	-1.62119	0.00549138
AKAP12	A-kinase anchoring protein 12	-1.6199	0.0120542
AC090774	novel transcript, antisense to CCDC144NL	-1.61632	0.0142138
SLC7A2	solute carrier family 7 member 2	-1.60069	0.0396226
CHD1	chromodomain helicase DNA binding protein 1	-1.59855	0.024155
EREG	epiregulin	-1.59114	7.10446e-07
KRT17	keratin 17	-1.58974	0.00940181
JUNB	JunB proto-oncogene, AP-1 transcription factor subunit	-1.58666	0.000178462
FOS	Fos proto-oncogene, AP-1 transcription factor subunit	-1.58286	0.00096197
HIF1A	hypoxia inducible factor 1 subunit alpha	-1.56755	0.02168
ZNF518A	zinc finger protein 518A	-1.54874	0.0347551
MIR22HG	MIR22 host gene	-1.52718	0.00444382
RB1CC1	RB1 inducible coiled-coil 1	-1.51118	0.0401263
RGPD8	RANBP2 like and GRIP domain containing 8	-1.5097	0.0455287
VPS13A	vacuolar protein sorting 13 homolog A	-1.5005	0.0466487
KLF7	Kruppel like factor 7	-1.49659	0.000322662
RCAN1	regulator of calcineurin 1	-1.4946	0.0147961
VLDLR	very low density lipoprotein receptor	-1.49108	0.00026585
NUAK2	NUAK family kinase 2	-1.48005	0.000618037
TENT5B	terminal nucleotidyltransferase 5B	-1.47972	0.000397841
EEA1	early endosome antigen 1	-1.47573	0.0466487
CEBPZ	CCAAT enhancer binding protein zeta	-1.47038	0.0410504
ESF1	ESF1 nucleolar pre-rRNA processing protein homolog	-1.47013	0.0417233
EIF5B	eukaryotic translation initiation factor 5B	-1.46151	0.0397878
PALM2AKAP2	PALM2 and AKAP2 fusion	-1.45864	0.000562903
BDP1	B double prime 1, subunit of RNA polymerase III transcription initiation factor IIIB	-1.45259	0.0413756
CCL20	C-C motif chemokine ligand 20	-1.44655	0.018307
MAFF	MAF bZIP transcription factor F	-1.43535	0.0189549
CHD9	chromodomain helicase DNA binding protein 9	-1.43307	0.028986
SMC3	structural maintenance of chromosomes 3	-1.42811	0.033847
CWC22	CWC22 spliceosome associated protein homolog	-1.42773	0.047832
FLNB-AS1	FLNB antisense RNA 1	-1.42553	0.00363801
ARRDC4	arrestin domain containing 4	-1.4237	0.0465783
ZBTB1	zinc finger and BTB domain containing 1	-1.42064	4.35187e-06
CLIP1	CAP-Gly domain containing linker protein 1	-1.41613	0.0414716
ROCK2	Rho associated coiled-coil containing protein kinase 2	-1.40378	0.0317767
PLG	plasminogen	-1.39384	0.00851692
PPIG	peptidylprolyl isomerase G	-1.39119	0.0455287
NR4A1	nuclear receptor subfamily 4 group A member 1	-1.3825	0.0274461
ALPK2	alpha kinase 2	-1.38029	0.0282045
HIVEP2	HIVEP zinc finger 2	-1.37713	0.032137
SYDE2	synapse defective Rho GTPase homolog 2	-1.37534	0.0168821
ATF3	activating transcription factor 3	-1.37451	0.0227701
KTN1	kinectin 1	-1.37293	0.0493796
ATP13A3	ATPase 13A3	-1.3713	0.0472918
ZHX1	zinc fingers and homeoboxes 1	-1.37012	0.0234826
AMOTL2	angiomotin like 2	-1.36706	0.00572217
ZNF267	zinc finger protein 267	-1.36491	0.0150846
LINC01876	long intergenic non-protein coding RNA 1876	-1.35301	0.0369906
CYP24A1	cytochrome P450 family 24 subfamily A member 1	-1.34005	2.2961e-05
NFE2L2	nuclear factor, erythroid 2 like 2	-1.3364	0.0227701
MEF2B	myocyte enhancer factor 2B	-1.3361	0.0121212
ZNF480	zinc finger protein 480	-1.33148	0.00572217
RAD50	RAD50 double strand break repair protein	-1.32302	0.0274461
NR1D2	nuclear receptor subfamily 1 group D member 2	-1.31937	0.0394445
AC011297	novel transcript, sense intronic to TBL1Y	-1.31591	0.0078936
CAVIN2	caveolae associated protein 2	-1.30718	0.0366354
RNF144B	ring finger protein 144B	-1.29471	0.00769948
ASXL2	ASXL transcriptional regulator 2	-1.29124	0.0258676
TTC3	tetratricopeptide repeat domain 3	-1.28876	0.0480277
CCDC112	coiled-coil domain containing 112	-1.28775	0.0376022
KLF10	Kruppel like factor 10	-1.28233	0.00112194
PRR26	proline rich 26	-1.28024	0.0263429
HEG1	heart development protein with EGF like domains 1	-1.27852	0.00718638
BCAT1	branched chain amino acid transaminase 1	-1.27208	0.0286147
ZNF195	zinc finger protein 195	-1.26866	0.00940181
TRIB3	tribbles pseudokinase 3	-1.25112	0.000916103
RASD1	ras related dexamethasone induced 1	-1.24668	0.00301798
AC020978	novel transcript	-1.24266	0.0206086
TWF1P1	twinfilin 1 pseudogene 1	-1.22054	0.019731
RNMT	RNA guanine-7 methyltransferase	-1.22029	0.0366596
NECTIN3-AS1	NECTIN3 antisense RNA 1	-1.21961	0.0173219
AL023806	novel transcript	-1.19823	0.0239104
NFAT5	nuclear factor of activated T cells 5	-1.19608	0.0455287
EGR1	early growth response 1	-1.18097	0.000617204
ZZZ3	zinc finger ZZ-type containing 3	-1.17583	0.00678393
GPAT3	glycerol-3-phosphate acyltransferase 3	-1.17318	0.000473262
ZFP1	ZFP1 zinc finger protein	-1.1702	0.0282045
GBP2	guanylate binding protein 2	-1.15663	0.0203709
ASNS	asparagine synthetase (glutamine-hydrolyzing)	-1.14864	1.28834e-06
ZNF800	zinc finger protein 800	-1.14532	0.0428985
RFFL	ring finger and FYVE like domain containing E3 ubiquitin protein ligase	-1.13051	0.00128462
GCLM	glutamate-cysteine ligase modifier subunit	-1.12465	0.010937
TIMM23B	translocase of inner mitochondrial membrane 23 homolog B	-1.12101	0.0186966
ZNF816	zinc finger protein 816	-1.12061	0.00733422
FOSL1	FOS like 1, AP-1 transcription factor subunit	-1.11992	0.00266082
LINC01622	long intergenic non-protein coding RNA 1622	-1.10386	0.0122481
MPP6	membrane palmitoylated protein 6	-1.10336	0.0201256
GCLC	glutamate-cysteine ligase catalytic subunit	-1.09687	0.0105086
SRXN1	sulfiredoxin 1	-1.06841	0.00527171
TXNRD1	thioredoxin reductase 1	-1.06625	0.00140433
NKX2-5	NK2 homeobox 5	-1.05616	0.0156889
FOSL2	FOS like 2, AP-1 transcription factor subunit	-1.05452	0.00249486
CAMSAP2	calmodulin regulated spectrin associated protein family member 2	-1.05352	0.0464146
LCN2	lipocalin 2	-1.04879	0.0277057
KLF5	Kruppel like factor 5	-1.04149	0.0255541
STK17A	serine/threonine kinase 17a	-1.03733	0.0227701
AC099568	novel transcript	-1.02146	0.000818065
JAG1	jagged canonical Notch ligand 1	-1.02104	0.00335473
TAT	tyrosine aminotransferase	-1.01699	0.020688
TPM1	tropomyosin 1	-1.0089	0.00658358
ASIC1	acid sensing ion channel subunit 1	1.00516	0.014221
PPP1R13L	protein phosphatase 1 regulatory subunit 13 like	1.0201	0.0167382
MAGEH1	MAGE family member H1	1.02115	0.018351
SSTR5-AS1	SSTR5 antisense RNA 1	1.0272	0.00686864
NRP2	neuropilin 2	1.02832	8.16092e-05
MEGF8	multiple EGF like domains 8	1.05433	0.0019763
CYSRT1	cysteine rich tail 1	1.06503	0.0380151
B4GALNT3	beta-1,4-N-acetyl-galactosaminyltransferase 3	1.07298	0.00298649
COL6A1	collagen type VI alpha 1 chain	1.07373	2.41772e-05
ZNF385A	zinc finger protein 385A	1.07508	0.0242087
DAO	D-amino acid oxidase	1.07524	0.0160343
PNRC1	proline rich nuclear receptor coactivator 1	1.08658	0.037993
TMEM159	transmembrane protein 159	1.09062	0.00370916
DKK1	dickkopf WNT signaling pathway inhibitor 1	1.10282	1.13169e-06
EFR3B	EFR3 homolog B	1.10531	0.00405745
AP001453	novel transcript	1.10979	0.0169691
PRF1	perforin 1	1.11266	0.0255541
TNFRSF25	TNF receptor superfamily member 25	1.11741	0.00244337
LDLRAD3	low density lipoprotein receptor class A domain containing 3	1.13111	0.0242627
NGFR	nerve growth factor receptor	1.14491	0.00112194
COLGALT2	collagen beta(1-O)galactosyltransferase 2	1.15614	0.000125886
NAT8L	N-acetyltransferase 8 like	1.159	0.00335473
ACTR1A	actin related protein 1A	1.17086	0.00512311
VSIG2	V-set and immunoglobulin domain containing 2	1.17121	0.0230028
TNFRSF14-AS1	TNFRSF14 antisense RNA 1	1.1981	0.00527171
VASH1	vasohibin 1	1.20105	0.023876
SPATC1L	spermatogenesis and centriole associated 1 like	1.21871	0.0260592
APBA2	amyloid beta precursor protein binding family A member 2	1.226	5.58709e-07
BICDL1	BICD family like cargo adaptor 1	1.22639	0.00408516
COL1A1	collagen type I alpha 1 chain	1.25486	3.16187e-07
NEURL1B	neuralized E3 ubiquitin protein ligase 1B	1.26389	0.0115113
LINC02413	long intergenic non-protein coding RNA 2413	1.28052	0.00221532
EMILIN3	elastin microfibril interfacer 3	1.28236	0.0258396
H2BC12	H2B clustered histone 12	1.29019	0.0144263
LSP1	lymphocyte specific protein 1	1.29669	0.020688
BIN1	bridging integrator 1	1.34303	0.0161465
SMTNL2	smoothelin like 2	1.36451	0.0267636
FAM43B	family with sequence similarity 43 member B	1.38629	0.00176272
SYT7	synaptotagmin 7	1.38939	0.000264746
MFAP2	microfibril associated protein 2	1.39004	1.74509e-05
TUBB8B	tubulin beta 8B	1.41723	0.0202268
ADAMTS7	ADAM metallopeptidase with thrombospondin type 1 motif 7	1.42658	0.0218706
SBK1	SH3 domain binding kinase 1	1.42824	0.00132569
WSCD1	WSC domain containing 1	1.43073	1.74509e-05
EPCAM-DT	EPCAM divergent transcript	1.43116	0.0282045
TAMALIN	trafficking regulator and scaffold protein tamalin	1.4398	0.000503775
PRRG4	proline rich and Gla domain 4	1.44294	0.0461694
CCDC137	coiled-coil domain containing 137	1.44637	0.0104033
CDYL2	chromodomain Y like 2	1.44645	0.023426
CCND2	cyclin D2	1.45217	7.71523e-10
TSPAN5	tetraspanin 5	1.45604	9.25243e-06
ANXA2R	annexin A2 receptor	1.4743	0.00769948
GLB1L2	galactosidase beta 1 like 2	1.48073	8.17675e-07
ADCY1	adenylate cyclase 1	1.49083	0.00116719
FRMPD2	FERM and PDZ domain containing 2	1.50285	0.00216574
MIR210HG	MIR210 host gene	1.52108	0.0115447
SDC3	syndecan 3	1.53444	5.66238e-07
NACAD	NAC alpha domain containing	1.53939	0.00438342
FGF17	fibroblast growth factor 17	1.54684	0.023426
KCNC4	potassium voltage-gated channel subfamily C member 4	1.58317	0.00060784
EEF1A2	eukaryotic translation elongation factor 1 alpha 2	1.60015	1.28239e-05
CCNG2	cyclin G2	1.61385	0.00746028
KIAA0513	KIAA0513	1.63012	0.000732901
TMSB4X	thymosin beta 4 X-linked	1.63262	5.27167e-11
ADAMTS2	ADAM metallopeptidase with thrombospondin type 1 motif 2	1.66272	0.0140862
PCDHGC3	protocadherin gamma subfamily C, 3	1.69416	0.000562903
IFIT1	interferon induced protein with tetratricopeptide repeats 1	1.70839	9.5856e-06
SYTL4	synaptotagmin like 4	1.71208	0.0146489
ATP2B2	ATPase plasma membrane Ca2+ transporting 2	1.74828	0.00270285
NYAP1	neuronal tyrosine phosphorylated phosphoinositide-3-kinase adaptor 1	1.78416	0.0381271
GRIP2	glutamate receptor interacting protein 2	1.86761	0.0230028
SFRP5	secreted frizzled related protein 5	1.90632	0.016316
PID1	phosphotyrosine interaction domain containing 1	1.92439	2.33282e-08
DISP2	dispatched RND transporter family member 2	1.97639	0.0320349
LINC02381	long intergenic non-protein coding RNA 2381	2.03502	9.03896e-10
RAC2	Rac family small GTPase 2	2.06487	0.0186811
SLC52A1	solute carrier family 52 member 1	2.1114	0.000464113
IGSF23	immunoglobulin superfamily member 23	2.15215	9.10081e-12
STPG3-AS1	STPG3 antisense RNA 1	2.32035	0.0205231
MDFI	MyoD family inhibitor	2.32955	0.0203709
AC007192	novel protein, readthrough between PIK3R2 and IFI30	2.50238	0.0246516
PLA2G4B	phospholipase A2 group IVB	2.60687	1.34803e-05
GATA5	GATA binding protein 5	2.63739	5.13764e-05
ZNF488	zinc finger protein 488	2.70574	0.028986
TMEM200A	transmembrane protein 200A	2.73887	5.02255e-06
FZD2	frizzled class receptor 2	2.75004	5.66238e-07
ALPL	alkaline phosphatase, biomineralization associated	2.76934	0.0401263
FBN2	fibrillin 2	2.77723	0.00572217
LAMP3	lysosomal associated membrane protein 3	2.77852	0.033847
GRHL3	grainyhead like transcription factor 3	2.88434	0.0250756
AP002761	novel transcript, overlapping to P2RY2	2.94445	0.0191397
CU633904	uncharacterized LOC102724951	4.28253	5.60608e-07
MIR4426	microRNA 4426	5.46726	0.0225281
LINC00672	long intergenic non-protein coding RNA 672	6.31165	5.66238e-07
ZDHHC22	zinc finger DHHC-type palmitoyltransferase 22	8.261	0.0371545
SNORD22	small nucleolar RNA, C/D box 22	8.41585	0.0455287
PGBD5	piggyBac transposable element derived 5	8.46129	2.51512e-06
FBLN2	fibulin 2	9.09539	0.018351
USP44	ubiquitin specific peptidase 44	9.16282	1.16607e-07
AC138696	novel protein	10.1297	1.12646e-06
AC005726	novel protein	10.3878	8.17675e-07
NANOGP6	Nanog homeobox pseudogene 6	10.7149	0.0301131
KIAA1614-AS1	KIAA1614 antisense RNA 1	10.9371	0.0128461
GGTLC2	gamma-glutamyltransferase light chain 2	11.0983	1.12321e-06
HOXC-AS1	HOXC cluster antisense RNA 1	11.2239	0.0156889
AL121583	novel transcript	11.2972	0.015517
AL772307	novel transcript	11.3062	1.52053e-06
AF001548	novel transcript, antisense to MYH11	11.4437	1.50837e-05
DHRS4L1	dehydrogenase/reductase 4 like 1	11.5887	0.00266082
C19orf71	chromosome 19 open reading frame 71	11.881	1.77892e-06
AL035461	novel protein	12.1192	6.58505e-08
AP000350	novel protein	12.5366	7.85334e-07
TNFSF12-TNFSF13	TNFSF12-TNFSF13 readthrough	13.2761	0.0443866
AC006064	novel transcript	13.8364	8.83823e-10
RPL36A-HNRNPH2	RPL36A-HNRNPH2 readthrough	15.1388	7.8928e-08
